# Supplementary material for: Climate changes during the Lateglacial in South Europe: new insights based on pollen and brGDGTs of Lake Matese in Italy
Source: Copernicus journal article supplement (doi:10.5194/cp-2022-54), 2022-07-28
Supplement: Supplementary file 1 [file cp-2022-54-supplement.zip]

Supplementary Table S1. Statistical results of the MAT, WAPLS, BRT and RF methods applied on the modern “warm mixed forest” (WAMX), “temperature deciduous” (TEDE) and “cold steppe” (COST) datasets.

| Model | Climate parameter                            | R <sup>2</sup> | RMSE   |
|-------|----------------------------------------------|----------------|--------|
| MAT   | MAAT (°C)                                    | 0,78           | 3,09   |
|       | MTWA (°C)                                    | 0,65           | 3,01   |
|       | MTCO (°C)                                    | 0,85           | 3,88   |
|       | PANN (mm.year <sup>-1</sup> )                | 0,75           | 183,11 |
|       | P <sub>winter</sub> (mm.year <sup>-1</sup> ) | 0,71           | 76,76  |
| WAPLS | MAAT (°C)                                    | 0,66           | 3,51   |
|       | MTWA (°C)                                    | 0,49           | 3,36   |
|       | MTCO (°C)                                    | 0,73           | 4,84   |
|       | PANN (mm.year <sup>-1</sup> )                | 0,55           | 220,36 |
|       | P <sub>winter</sub> (mm.year <sup>-1</sup> ) | 0,51           | 90,95  |
| RF    | MAAT (°C)                                    | 0,61           | 3,72   |
|       | MTWA (°C)                                    | 0,42           | 3,52   |
|       | MTCO (°C)                                    | 0,71           | 4,94   |
|       | PANN (mm.year <sup>-1</sup> )                | 0,56           | 212,27 |
|       | P <sub>winter</sub> (mm.year <sup>-1</sup> ) | 0,53           | 87,14  |
| BRT   | MAAT (°C)                                    | 0,87           | 2,97   |
|       | MTWA (°C)                                    | 0,77           | 2,94   |
|       | MTCO (°C)                                    | 0,91           | 3,77   |
|       | PANN (mm.year <sup>-1</sup> )                | 0,87           | 160,43 |
|       | P <sub>winter</sub> (mm.year <sup>-1</sup> ) | 0,84           | 70,37  |
